1 **Title: The power of peer networking for improving STEM faculty**  
2 **job applications: a successful pilot program**

3 **Authors:** Carlos M. Guardia<sup>1</sup>, Erin Kane<sup>2</sup>, Alison G. Tebo<sup>3</sup>, Anna A.W.M. Sanders<sup>4</sup>, Devrim  
4 Kaya<sup>5</sup>, Kathleen E. Grogan<sup>6,\*</sup>

5  
6 **Author information**

7 1 - Neurosciences and Cellular and Structural Biology Division, *Eunice Kennedy Shriver*  
8 National Institute of Child Health and Human Development, National Institutes of Health,  
9 Bethesda, Maryland, USA

10 2 - Department of Anthropology, Boston University, Massachusetts, USA

11 3 - Howard Hughes Medical Institute - Janelia Research Campus, Ashburn, Virginia, USA

12 4 - Department of Biochemistry and Molecular Biology, University of Iowa, Iowa, USA

13 5 - School of Chemical, Biological, and Environmental Engineering, Oregon State University,  
14 Corvallis, OR, USA

15 6 - Departments of Anthropology and Biology, University of Cincinnati, Ohio, USA

16

17 \*corresponding author: Kathleen E. Grogan, Departments of Anthropology and Biology,  
18 University of Cincinnati, Ohio, USA

19 Email: [kathleen.e.grogan@gmail.com](mailto:kathleen.e.grogan@gmail.com), [groganke@uc.edu](mailto:groganke@uc.edu)

20 **Abstract:**

21 In order to successfully obtain a faculty position, postdoctoral fellows or 'postdocs', must  
22 submit an application which requires considerable time and effort to produce. These job  
23 applications are often reviewed by mentors and colleagues, but rarely are postdocs offered the  
24 opportunity to solicit feedback multiple times from reviewers with the same breadth of expertise  
25 often found on an academic search committee. To address this gap, this manuscript describes  
26 an international peer reviewing program for small groups of postdocs with a broad range of  
27 expertise to reciprocally and iteratively provide feedback to each other on their application  
28 materials. Over 145 postdocs have participated, often multiple times, over three years. A survey  
29 of participants in this program revealed that nearly all participants would recommend  
30 participation in such a program to other faculty applicants. Furthermore, this program was more  
31 likely to attract participants who struggled to find mentoring and support elsewhere, either  
32 because they changed fields or because of their identity as a woman or member of an  
33 underrepresented population in STEM. Participation in programs like this one could provide  
34 early career academics like postdocs with a diverse and supportive community of peer mentors  
35 during the difficult search for a faculty position. Such psychosocial support and encouragement  
36 has been shown to prevent attrition of individuals from these populations and programs like this  
37 one target the largest 'leak' in the pipeline, that of postdoc to faculty. Implementation of similar  
38 peer reviewing programs by universities or professional scientific societies could provide a  
39 valuable mechanism of support and increased chances of success for early-career academics  
40 in their search for independence.

41

## 42 Introduction

43 The purpose of a postdoctoral appointment is the acquisition of additional skills or  
44 training post-PhD in preparation for transitioning into an independent position as a primary  
45 scientific investigator (National Research Council 2014), originally in academia (NAS et al.  
46 2000), although the function has broadened to include training for a multitude of other career  
47 paths (McConnell et al. 2018). Thus, by definition postdoctoral appointments are temporary  
48 (average = ~2.7 years; Acton et al. 2019, Andalib et al. 2018, McConnell et al. 2018, but see  
49 Fernandes et al. 2020), although individuals may complete multiple postdoctoral positions in  
50 different labs before gaining independence (Powell 2020, Shaw et al. 2015, Woolston 2020).  
51 Because of the limited duration and lack of funding security for postdoctoral positions, and the  
52 highly competitive tenure-track faculty job market (Alund et al. 2020, Andalib et al. 2018, Kahn &  
53 Ginther 2017, Sauermann & Roach 2012, Zimmerman 2018), postdocs spend a significant  
54 amount of time searching for their next appointment. Some will begin to search for the next  
55 position as soon as they begin their current position and many apply for postdoctoral and  
56 tenure-track positions simultaneously over multiple years (Fernandes et al. 2020).

57 An application packet for a faculty position ('faculty application') consists of multiple  
58 highly crafted documents, typically including a curriculum vitae (CV), cover letter, statements of  
59 research, teaching, and, sometimes, diversity (for a description of these documents and the  
60 faculty application process, see Fernandes et al. 2020, Groll 2017). To maximize the chance of  
61 success, applicants spend a significant amount of time writing and polishing these documents.  
62 Numerous opinion and advice pieces have been published on how to write these documents  
63 (e.g., Anderson 2019, Reyes 2020, Smith 2020a & 2020b). In addition, Offices of Postdoctoral  
64 Education across institutions, as well as the National Postdoctoral Association in the USA, and  
65 some scientific societies host frequent seminars/webinars and provide extensive advice on the  
66 structure and content of these documents (e.g., Omary et al. 2019, Shaw et al. 2015). Almost all  
67 of these seminars and advice columns direct postdocs to solicit feedback from a wide circle of  
68 peers and mentors.

69 Formal and informal mentors are often willing to provide constructive feedback (Hayter &  
70 Parker 2019); however, some mentors may be unwilling to spend time on this task or unable to  
71 offer useful feedback, especially for postdocs applying for positions in fields or institutions  
72 different than the mentors' own (Alund et al. 2020, Aschwanden 2006, Hayter & Parker 2019,  
73 Scaffidi & Berman 2011). Postdoctoral peers and senior graduate students can also serve as  
74 additional reviewers, but most research groups only have a couple of postdocs at a time or may  
75 have none at all (Acton et al. 2019, Bruckman & Sebestyen 2017). Moreover, the breadth of  
76 scientific expertise represented within a research group or postdoc's network rarely matches the  
77 breadth of expertise represented by search committees in academia. Thus, while one's  
78 colleagues/labmates may be able to comment on the structure and the science within a job  
79 application, they may not be able to assess if a research statement is broad and general  
80 enough to be understood by, and appeal to the wider audience represented by a search  
81 committee. Furthermore, while mentors and peers may be happy to review a document a few  
82 times, most mentors and peers lack the time to provide multiple rounds of feedback on >10  
83 pages of job application materials.

84 Overall, opportunities to have job applications critiqued repeatedly by a broad scientific  
85 audience are generally scarce. Regardless of the underlying causes, postdocs could benefit  
86 from a variety of options for getting feedback on their job application materials. This situation is  
87 exacerbated for postdocs from marginalized groups, who are more likely to struggle to form a  
88 supportive peer network and have less access to mentoring and support than postdocs from  
89 majority groups (Beech et al. 2013, Yadav & Seals 2019). Therefore, here, we present a  
90 potential solution in the form of an open and inclusive international program of peer review for  
91 job application materials that we have been running since 2018. In this program, participants  
92 have the opportunity to repeatedly share all or part of their application package with a small  
93 group of peer reviewers. They engage in reciprocal constructive commentary in a supportive  
94 and encouraging manner with the ultimate desire of seeing each other attain an independent  
95 faculty position. Peer review programs are most well-known from their use in manuscripts  
96 (Rennie 2016, Tennant et al. 2017, Tennant & Ross-Hellauer 2020, but see Haffer et al. 2019,  
97 Murray et al. 2018) and grant application review (Azoulay & Li 2020, Demicheli et al. 2007,  
98 Marsh et al. 2009 but see Lauer & Roychowdhury 2021, Witteman et al. 2019), but have been  
99 successfully implemented in many other contexts for purposes of professional development and  
100 community building, especially for postdocs and early career researchers (Dickson et al. 2021,  
101 Eisen & Eaton 2017, Kulage et al. 2017).

102 This manuscript has three goals: i) to describe the history and organizational details of  
103 our program; ii) to use survey data to assess the experiences of participants and  
104 nonparticipants on the benefits and limitations of this type of program; and iii) to suggest  
105 methods of implementation for other organizations (i.e., Offices of Postdoctoral Education,  
106 postdoctoral societies, or scientific societies).

## 107 Program Description

108 This program began organically after its founder, Dr. Grogan, observed frequent  
109 requests for peer review of job application materials on the FuturePI Slack Group  
110 (<https://futurepislack.wordpress.com/>) and realized the group could benefit from the organization  
111 of formal peer-reviewing of application materials during the Fall 2018 job application season. In  
112 its first year, the FuturePI Reviewing Groups program (hereafter called the Program) ran for 7  
113 weeks, from mid-August to mid-October. In subsequent years, the timeline expanded to 15  
114 weeks, from early August to the end of November (Supplemental Material). The program is  
115 announced through the FuturePI Slack #general and #Jobapp\_reviewer channels two weeks  
116 before its start to give participants time to sign up, with sign-ups handled on an open-access  
117 Google Sheet. Participants are asked to provide their names, email addresses, general field of  
118 study, and the type of jobs they are applying to, and to indicate which weeks they would like to  
119 participate (see Supplemental Figure 2 for example). Reviewing groups are organized weekly,  
120 with sign-ups for the upcoming week closing on Sunday morning. All interested participants for a  
121 given week are emailed the day before groups are assigned to confirm their willingness to  
122 participate that week, and then reviewing groups are organized the next morning. Each  
123 reviewing group is emailed at the start of the week with contact information for their group and  
124 instructed to send whatever documents they want to be reviewed and to provide feedback on  
125 each other's documents by the end of the week (for example announcement, confirmation, and  
126 assignment emails, see Supplemental Materials). For the first three years of operation,

127 participants were instructed to send their documents to each other on Monday and provide  
128 feedback for group members' documents by Friday, but this schedule can be adjusted easily.  
129 Participation in the program is open to any current member of FuturePI Slack and the program  
130 has grown since its first year, from 21 unique participants in 2018 to 71 in 2020 (Figure 1A). The  
131 number of unique individuals who participate each week varies considerably (mean = 8.7, range  
132 = 3-17; Figure 1B), but has steadily increased since the program's beginning ( $F = 4.363$ ,  $p =$   
133  $0.02$ , Figure 1C). Additionally, the number of times that any given individual participates has  
134 also increased, although not significantly ( $F = 1.039$ ,  $p = 0.36$ ; Figure 1D).  
135

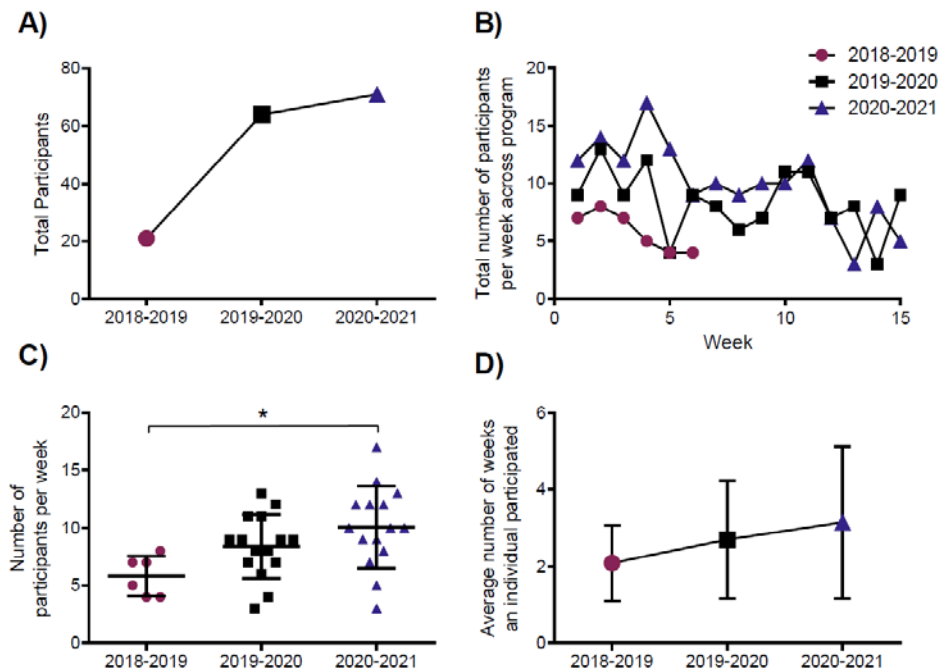

136  
137 **Figure 1.** Program participation for the FuturePI Reviewing Groups Program from 2018 to 2021. A) The  
138 total number of unique individuals who participated in the reviewing program per year, B) the total number  
139 and C) average of individuals who participated each week of the program by year, D) the average number  
140 of weeks an individual participated by year.

## 141 Program Feedback Survey

142 Given the increase in participation and anecdotal commentary about the benefits of participating  
143 in the program, we developed a survey for participants and non-participants in the Program to  
144 assess participants' experiences and identify areas for improvement (Supplemental Table 1).  
145 Through this survey (University of Cincinnati IRB# 2020-0891), we collected demographic and  
146 participation-related information from members of the FuturePI Slack community. To maintain  
147 anonymity and promote ease of response, the survey, which took ~5-10 minutes to complete,  
148 was conducted through Google Forms and all questions were optional, except the IRB  
149 permission. Respondents were recruited from previous and current participants in the program  
150 either through messages posted on FuturePI Slack or through direct email. Responses were  
151 collected within two months starting in early February and ending at the end of March 2021.

152 Data were organized and analyzed in Excel, OriginPro2015, and GraphPad Prism 6  
 153 respectively. Answers to open-ended questions were stripped of white space, punctuation,  
 154 numbers, and English “stop words” (e.g., and, the, is) using the package *tm* (Version 0.7-8;  
 155 Feinerer & Hornik 2020) and after manual editing to change plural nouns to singular nouns and  
 156 stem words with the same root (e.g., standardizing review, reviews, and reviewed as “review”).  
 157 Then word clouds were generated using the package *wordcloud* (Version 2.6; Fellows 2018) in  
 158 RStudio.

159 Survey Respondent Demographics

**A) Gender**

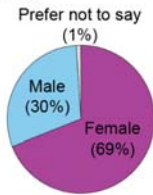

**B) Race/Ethnicity**

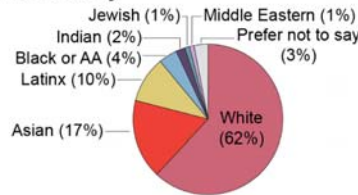

**C) Disability**

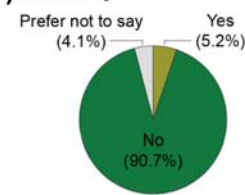

**D) Field of Study**

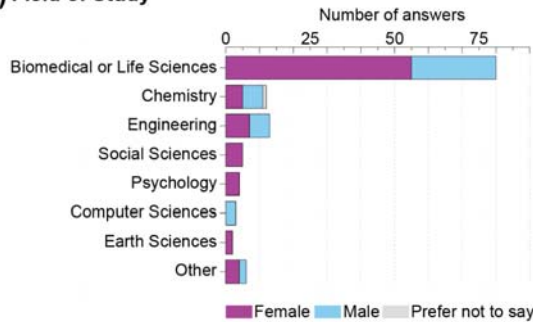

**E) Current Position**

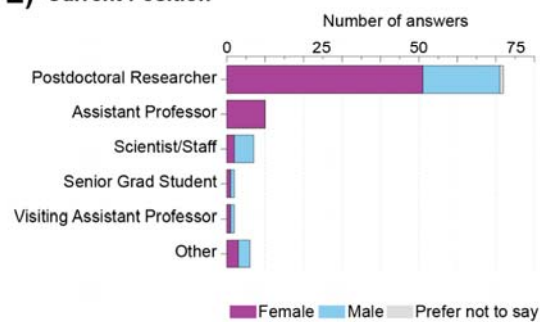

**F) Years in Position**

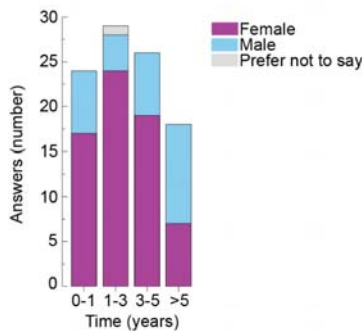

**G) Location: Current and Applications**

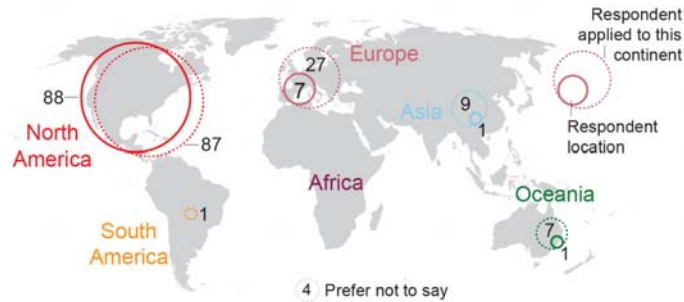

**H) Scientific Trajectory**

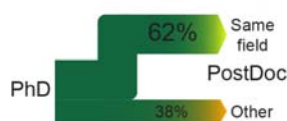

**I) Types of Institutions**

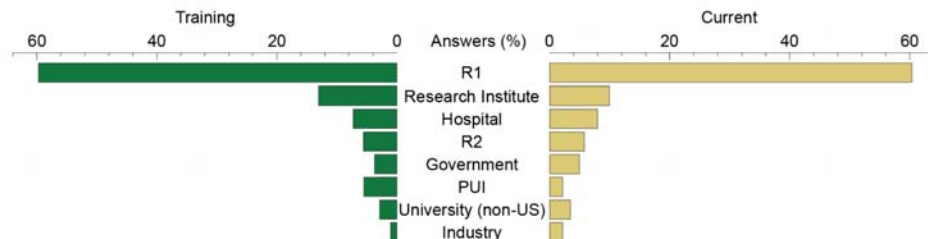



161 *Figure 2. Self-identified demographics and career information of survey respondents, which included both*  
162 *program participants and non-participants: the distribution of survey respondents by A) gender, B)*  
163 *race/ethnicity, and C) disability status; The distribution of respondents, split by gender, according to D)*  
164 *field of study, E) current position title, and F) years in current position; G) map of the current location of*  
165 *survey respondents (solid circles) compared to the location of positions to which respondents applied*  
166 *(dashed circles); H) the representation of percentage of survey respondents who either remained in the*  
167 *same field as their Ph.D. training or switched scientific fields post-graduation; I) the type of institution at*  
168 *which survey respondents were or are employed.*

169

170

171 All individuals who participated in the survey, regardless of whether they participated in the  
172 Program, are hereafter referred to as respondents, while respondents who participated in the  
173 Program are referred to as participants and those who did not participate as non-participants,  
174 respectively. The majority of our survey respondents (n = 97), which included both program  
175 participants and non-participants, identified as female (69%), white (62%), and did not identify  
176 as disabled (90.7%; Figure 2A-C). The respondents of this study were more likely to identify as  
177 female compared to the respondents of the 2016 USA National Postdoctoral Survey and a  
178 recent survey of faculty job applicants, in which 53% and 48.2% of respondents identified as  
179 female, respectively (Fernandes et al. 2020, McConnell et al. 2018, but see Afonja et al. 2021).  
180 In contrast, in this study, the self-identified race/ethnicity of the respondents was similar to that  
181 reported for other postdoctoral or faculty application populations for white, Black or African  
182 American, and Latinx/Hispanic identities. Additionally, this study unexpectedly included fewer  
183 Asian respondents (17.0%) compared to the percentage of Asian postdocs in the US  
184 postdoctoral population (24.8%; McConnell et al. 2018). Nearly 10% of our respondents  
185 identified as having a disability, higher than the 6% (12 out of 175) reported by a similar survey  
186 of postdocs and early career researchers in ecology and evolution (Wanelik et al. 2020).

187

188 Compared to a recent survey of faculty applicants (also organized in part through FuturePI  
189 Slack; Fernandes et al. 2020), the respondent population of this study was similarly biased  
190 towards postdocs over graduate students, staff scientists, or Assistant Professor and had many  
191 more respondents working in Biomedical or Life Sciences, with less than 15 respondents each  
192 from Chemistry, Engineering, Social Sciences, and other fields (Figure 2D-E). As FuturePI  
193 Slack is an international organization, the survey respondents were located across the globe  
194 and were applying to a similarly broad geographic range of jobs (Figure 2G). We had a nearly  
195 equal number of survey respondents across the various ranges of job tenure from 0-5 years.  
196 Nearly 54% of respondents were currently employed at an R1 institution (Carnegie  
197 classification), with the rest of the respondents mostly employed at research institutes,  
198 hospitals, R2 or PUI institutions, or in government positions (Figure 2I). Fewer respondents  
199 (40.8%) reported being trained at an R1 institution compared to other types of institutions.  
200 Interestingly, nearly 40% of our survey respondents reported they had changed fields between  
201 their PhD and their current position (Figure 2H). Of the 97 survey respondents, a majority (n =  
202 58; Figure 5A) were participants in the Program at least once in the previous three years while  
203 39 respondents were non-participants.

204

205 Survey Respondent Job Application Journey  
206

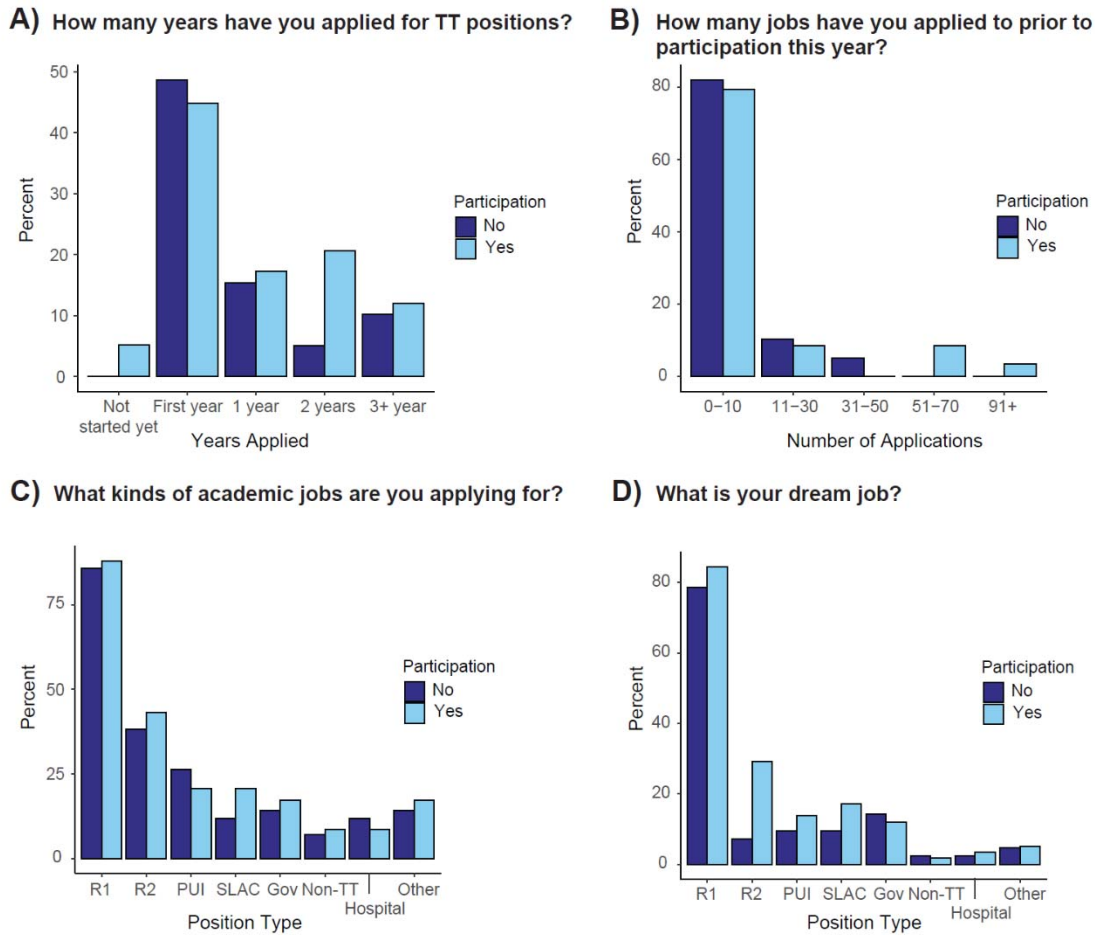

207  
208 *Figure 3. Comparison of the faculty job application journey for participants and nonparticipants: A) the*  
209 *number of years spent searching for a faculty job, B) number of job applications and C) types of job*  
210 *applications submitted by participants and nonparticipants, and D) the dream job for participants and*  
211 *nonparticipants. For C & D, Other includes applications for faculty, research scientist, and postdoctoral*  
212 *positions at Professional Schools, Research Institutes, non-profits, and industry companies*  
213

214 To assess the job application trajectory difference between participants and non-participants,  
215 the survey included questions detailing the number of years respondents had been on the job  
216 market, as well as the number of job applications submitted either prior to the program  
217 (participants) or prior to this year (non-participants). Respondents in their first year of the job  
218 market were the largest portion (>40% of total) for both participants and non-participants (Figure  
219 3A). However, more than 30% of participants were in their third or greater year of the job search  
220 compared with only ~15% of non-participants (Figure 3A, left two columns). Notably, three  
221 participants were in their sixth year on the job market. While the majority of respondents (~80%)  
222 had submitted ten or fewer applications, some of the respondents had already submitted  
223 substantial numbers of applications, including six individuals who reported submitting >90  
224 applications. In comparison, none of the non-participant had submitted more than 50

225 applications at the time of the survey. From these data, we observed that the participants  
226 tended to be further along in their job search trajectory, having spent more years searching for  
227 jobs and submitting many more applications.

228  
229 The types of institutions that the respondents applied to as well as their ideal position were also  
230 examined in the survey. Among all respondents, R1 universities were the most applied to  
231 position (n = 51 participants and 33 non-participants of 97 total respondents) and most  
232 frequently reported dream position (n = 49 participants and 31 non-participants). The  
233 participants applied to more non-R1 positions compared to non-participants, which could be due  
234 to the career stage and experience of the participant in previous job cycles leading to a  
235 broadening of their targeted institution. More participants also reported that their dream jobs  
236 were at non-R1 educational institutions, e.g. R2 universities, primary undergraduate institutions  
237 (PUIs), and small liberal arts colleges (SLACs).

238

### 239 Reviewer Availability for Survey Respondent Application Materials

#### A) How many people reviewed your material?

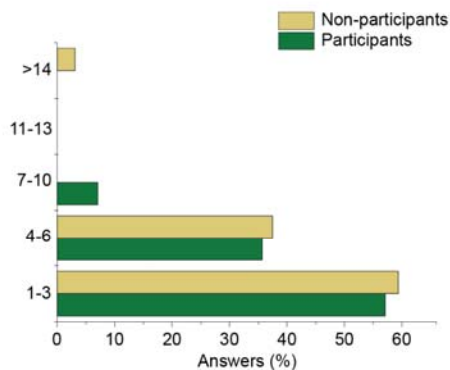

#### B) What were the career stages of the people who reviewed your materials?

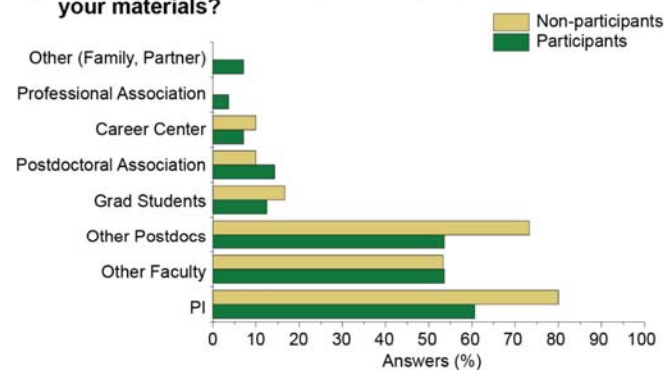

#### C) Does your institution have an Office for professional development?

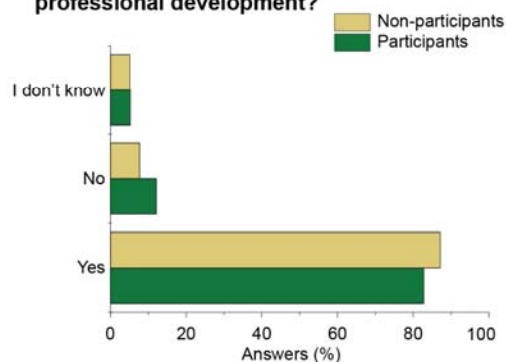

#### D) Do they offer editing services for job application materials?

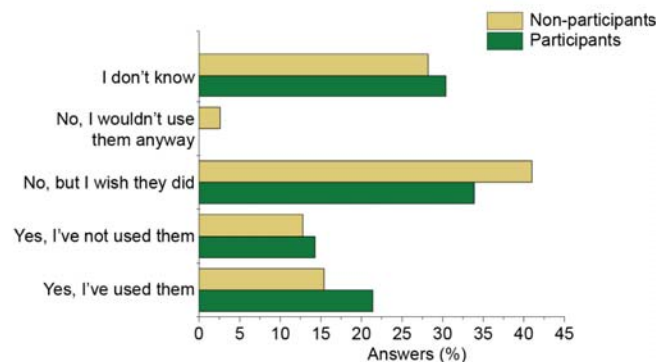

240

241 *Figure 4. Information on the availability of reviewers for survey respondents' job application materials: A)*  
242 *the number and B) career stages of reviewers recruited by survey respondents to review their job*  
243 *application materials, C) the percentage of survey respondents who work at an institution that has an*  
244 *Office focused on professional development, D) if those offices offer job application editing services, and*  
245 *if the respondents have taken advantage of those services or not.*

246



247 Most of the respondents had their application materials reviewed by either 1-3 people (55-60%)  
248 or 4-6 people (35-40%) outside the Program. The application material reviewers consisted of  
249 mostly PI, other faculty, and postdoctoral colleagues, but the percentage differed between  
250 participants and non-participants. For participants, slightly over 60% had their PI review their  
251 materials, ~53% had other faculty reviewers, and nearly 55% recruited other postdoctoral  
252 colleagues to review their materials. In contrast, for non-participants, ~80% were able to have  
253 their PI review their materials, ~53% had other faculty reviewers, and nearly 75% were able to  
254 recruit other postdoctoral colleagues to review their materials. In other words, participants were  
255 less likely to have their job application materials reviewed by their PI or other postdoctoral  
256 colleagues but were equally likely to have non-PI faculty review their materials. Fewer than 15%  
257 of survey respondents, regardless of Program participation, asked graduate students, their  
258 postdoctoral association or career center, or other individuals to review their materials.

259  
260 Although the majority of survey respondents (>80%) were employed at institutions with Offices  
261 for Professional Development, many respondents were either unsure (25-30%) if these offices  
262 offered editing services or reported these offices did not offer those services (~35-45%). Of  
263 those respondents with professional development offices that offered editing services, the  
264 participants (22%) were slightly more likely to have used those services than non-participants  
265 (15%). Altogether, over 50% of both participants and non-participants indicated either a  
266 willingness to use editing services provided by offices of professional development or a wish  
267 that they would offer those services.

268

269 Program Participation Data

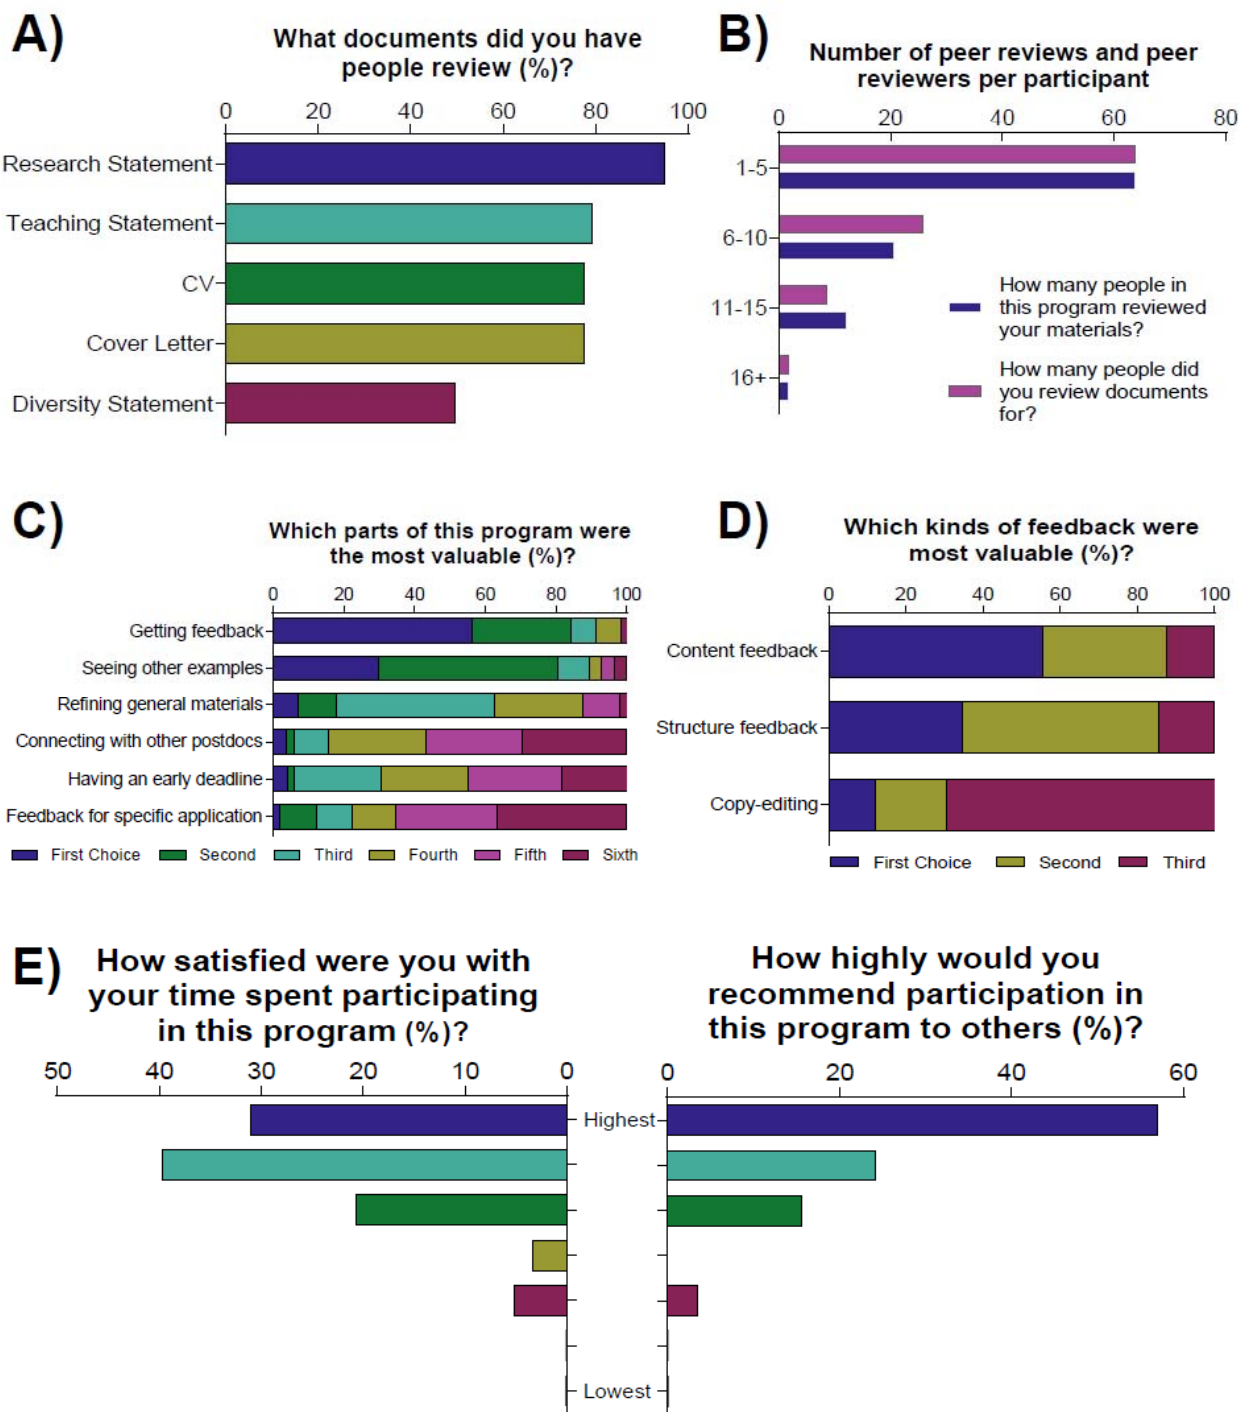

270

271 **Figure 5.** Participants were asked to indicate: A) the documents they had peer-reviewed in the program,

272 and B) how many people reviewed the documents for each participant and how many people each

273 participant reviewed documents for, C) the parts of the program and D) types of feedback that

274 *participants felt were most valuable, and E) participants indicated how satisfied they were with their*  
275 *participation in the FuturePI Reviewing Groups Program and how highly they would recommend*  
276 *participation in the program to others.*  
277

278 With nearly all participants indicating they had submitted the research statement for peer  
279 review, the research statement was the most reviewed document (Figure 5A) followed closely  
280 by the teaching statement, CV, and Cover Letter. The least reviewed document was the  
281 Diversity Statement, which may reflect that fewer job applications require this document or the  
282 more personal nature of this particular document. The majority (~65%) of the participants  
283 reviewed documents and had their documents reviewed by 1-5 people (Figure 5B), implying  
284 they participated for 1-2 weeks. Receiving general feedback and seeing other job application  
285 examples were reported as the two most valuable aspects of participation by over 80% of the  
286 participants (Figure 5C). Refining materials, connecting other postdocs, and having an early  
287 deadline were rated as comparably less important or valuable aspects of participating in the  
288 program. Comments on the content were reported as most valuable and copy-editing being the  
289 least valuable type of feedback (Figure 5D). Participants reported extremely high satisfaction  
290 with their participation in the Program, with only 8.6% (5/58) giving a rating lower than 5 out of 7  
291 (Figure 5E). Similarly, 96.5% of respondents (56/58) reported they would likely or highly likely to  
292 recommend participation in the Program to other colleagues.  
293

**A) Why did applicants decide to participate in the FuturePI Reviewing Groups Program? (n=49)**

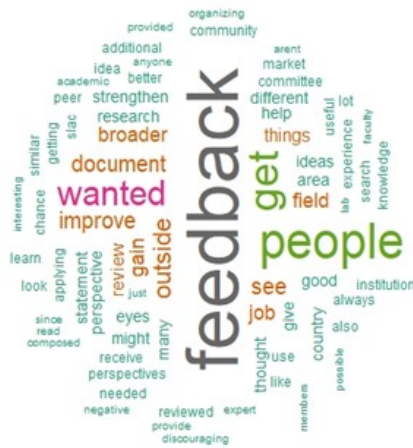

**B) What concerns did applicants have about participating in the FuturePI Reviewing Groups Program? (n=42)**

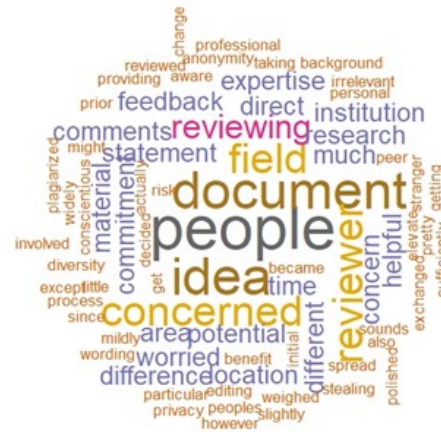

**C) What impact did participating have on applicants? (n=41)**

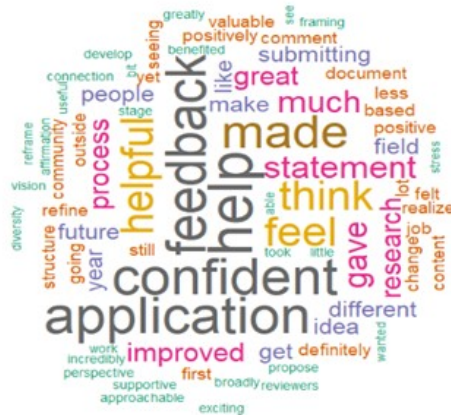

**D) What were some examples of helpful feedback? (n=16)**

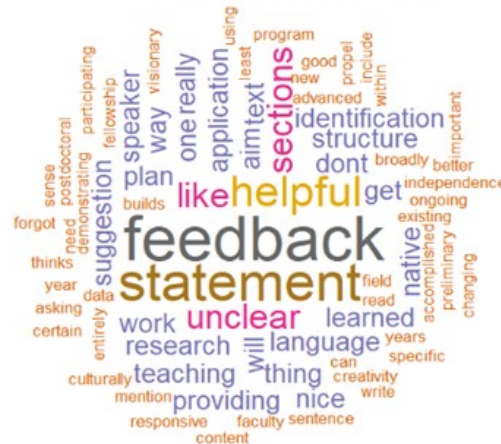

294

295

296

297

298

299

300

301

302

303

304

305

306

307

**Figure 6.** Word clouds highlighting the most common responses of the participants to the open-ended questions on: A) why they decided to participate in the program, B) what concerns they had about participating prior to doing so, C) what impact did participation have on their job application journey, and D) what were some examples of helpful feedback.

When asked about their motivations for participating in the Program, the respondents were primarily motivated (Figure 6A) to i) seek feedback beyond their own lab (n = 34), especially from peers (n = 12) and people outside of their subdiscipline (n = 16) and ii) to use examples from others to better organize their job documents (n = 10):

*"I wanted a broader perspective than could be provided from just the members of my lab, since a faculty search committee will be composed of many people who aren't experts in my area. I also wanted as many eyes as possible to read my documents. And I wanted to see the documents of others to see if anyone had any interesting ideas I could use."*

308 *“To get more positive feedback (my PI gave me very negative feedback and it’s [sic]*  
309 *discouraging).”*

310 *“It was an amazing opportunity to receive feedback from people unfamiliar with my*  
311 *work/area/research, and who could be honest with their feedback as they had no*  
312 *investment in the outcome.”*

313 The majority of participants noted, as shown in the representative quotes below, that their  
314 participation in the Program improved their confidence in their job application materials, the  
315 application process (n = 13; Figure 6C), and the quality of their materials (n = 17), and that they  
316 felt more supported during the job application process, which is often a stressful and isolating  
317 (n = 14):

318 *“A little bit of positive affirmation took some stress out of the process.”*

319 *“It gave me more confidence, both because someone had looked at my stuff and*  
320 *because I felt like a part of a community and that I didn't have to do this all on my own -*  
321 *there were other great people like me going through the same thing.”*

322 *“The first year was very helpful. As a first gen with a non-helpful PI, I had no idea of how*  
323 *the process worked or what was expected. The second year was less helpful as I felt*  
324 *participants were expecting solid feedback without putting in as much effort reviewing for*  
325 *others.”*

326 *“I'm still on the job market, but it helped me realize that I'm in the same boat as everyone*  
327 *else.”*

328  
329 In contrast, only three participants felt that their participation had little or no impact. When asked  
330 to provide examples of helpful feedback, the participants noted they received helpful feedback  
331 about the grammar and structure of their documents (n = 9) and identifying areas which needed  
332 more clarity (n = 8):

333 *“One of my reviewers suggested a way to structure my teaching statement that I hadn't*  
334 *considered. I still use it!”*

335 *“Pointing out sections that would be unclear to a broader audience, suggestions on how*  
336 *to highlight future plans (i.e., what will your lab look like/do)”*

337 *“Grammatical errors were plenty in my text, since I am not a native speaker. So it was*  
338 *very helpful for me that (apparently) a native English speaker edited my texts.”*

339 *“Someone told me “This is really cool and I can't wait to see what happens when you get*  
340 *a job!” which was so nice and affirming to hear - this whole process is so demoralizing*  
341 *and kind of dehumanizing, and it's really hard to get feedback (and praise, honestly) from*  
342 *people who don't already know you. This person offered helpful constructively critical*  
343 *feedback too, but that was such a nice boost.”*

344 The majority of participants, 29 out of 42, had no concerns about participating (69%). When the  
345 participants expressed concern, their concerns revolved primarily around competition and  
346 plagiarism (n = 8) or the lack of relevant feedback from reviewers (n = 7):



347 *“In editing peers' diversity statements in particular, I became a little concerned that this*  
348 *process might elevate people's statements to sound more aware and conscientious than*  
349 *they actually are on their own.”*

350 *“Some concerns about competition with those who may be applying to the same positions*  
351 *as myself.”*

352 *“I was worried that my reviewers [sic] fields would be very different from my own.”*

353 *“Some of the feedback I received seemed rushed and as though the other participant*  
354 *hadn't put much effort into reviewing my documents.”*  
355

356 Among the non-participants, 22 out of 38 were aware of the Program's existence before the  
357 survey (Figure 7A), but many of these respondents either were not on the job market in the prior  
358 year (n = 6), were too busy (n = 6), or had gotten feedback elsewhere (n = 8) . Of those that  
359 planned to go on the job market soon, most (11/19) planned to participate in the Program in the  
360 future or were undecided (6/19) - very few non-participants planned never to participate in the  
361 Program (2/19; Figure 7B). In our open-ended question about their reasons for not participating,  
362 non-participants reported that they generally heard about the Program too late or did not have  
363 job materials ready (n = 9), or they wanted feedback from different people than they thought  
364 participated (n = 6; Figure 7C):

365 *“I would prefer feedback from people who have already successfully secured the type of*  
366 *position I would like.”*

367 *“The main reason I did not think feedback from the peer reviews would be useful was*  
368 *that I assumed the majority of reviewers were peers who had yet to successfully get a*  
369 *job, and therefore their comments would be less useful than those of people who had*  
370 *successfully applied for and gotten an academic position, or people who had served on*  
371 *search committees. I do not know how this issue could be addressed within the Future*  
372 *PI Slack community, except to ask those who have since moved on to the next career*  
373 *stage to contribute back.”*

374 *“I'd like to participate in this program if I know this review program before my*  
375 *applications.”*



408 scientific journey, from early graduate student to full professors, a feeling that is exacerbated for  
409 individuals from underrepresented or marginalized populations (Stachl & Beranger 2020). Data  
410 suggest, however, that having a scientific and social community play a significant role in  
411 individual success (Brommer & Eisen 2007, Ysslyk et al. 2019). Further, socio-emotional  
412 support and encouragement promote persistence in research careers for early career  
413 researchers while lack of these types of support is associated with disengagement from  
414 research and possibly attrition (Lambert et al. 2020, Pyhalto et al. 2017, Vekkaila et al. 2016).  
415 Social support can even combat, to a small degree, the negative psychological impact of sexism  
416 and racism within academia (Rodrigues et al. 2021).

417 Our survey data suggest that at least the Program, and likely FuturePI Slack more  
418 broadly, provides vital support to individuals facing greater difficulty in finding mentors for career  
419 support, either because of their career trajectory or identity. First, the respondents of this study  
420 are more likely to identify as members of historically underrepresented or marginalized groups,  
421 e.g., as female (although survey respondents overall are more likely to identify as female: Cull  
422 et al. 2005, Sax et al. 2003) or as non-white men, than the pool of postdocs in the USA, where  
423 the majority of the respondents are employed. This result is particularly notable given that, in  
424 biomedical sciences at least, men and women are equally represented in early career stages of  
425 PhDs and postdocs (NSF 2017), but women are significantly less likely than men to transition to  
426 an independent PI position (Lerchenmueller & Sorenson 2018), representing only 40% of  
427 assistant professors and 30% of associate professors (Jena et al. 2015). The transition from  
428 postdoc to independent PI is a major barrier for individuals from underrepresented minority  
429 populations (Bhalla 2019, Meyers et al. 2018). However, targeted interventions (e.g. peer review  
430 programs or workshops) can significantly increase postdoc confidence in their ability to apply to  
431 faculty jobs, which is predicted to increase persistence (Yadav & Seals 2019) at the career  
432 stage when these postdocs are most likely to 'leak' out of the pipeline. The demographics of our  
433 survey respondents likely also influenced the broad range of jobs our participants apply to:  
434 female and underrepresented minority postdocs are more likely to be interested in pursuing both  
435 research-intensive and teaching-intensive jobs, rather than only research-intensive jobs, and  
436 postdocs who are three or more years into their position are less committed to remaining in  
437 academia than postdocs in their first or second year (Lambert et al. 2020). Alternatively,  
438 postdocs who receive less mentoring from their primary supervisor are less likely to pursue an  
439 academic research career (Scaffidi & Berman 2012).

440 Further, participants were less likely to ask their PI or other postdocs to review their job  
441 application materials than the non-participants. This difference may be due to lack of support  
442 more broadly and/or because nearly 40% of our respondents switched fields between their PhD  
443 and their current position, a trend that is becoming increasingly common (Zeng et al. 2019), and  
444 thus may lack a broad network within their current field. Compared to non-participant  
445 respondents, the participants have spent more years on the job market, applied to more jobs,  
446 and a wider range of jobs, possibly reflecting a wider net cast by individuals searching for a  
447 position for longer. Lastly, the responses to the open-ended survey questions on the benefits of  
448 participating in the program confirmed that participants frequently received positive affirmation  
449 on the quality of their materials, which helped them to gain confidence and combat imposter  
450 syndrome while in the midst of the grueling search for a faculty job. Multiple respondents, in  
451 commenting on the difficulty and stress of searching for a faculty position, specifically mentioned

452 that participating in the Program helped them to feel less alone (e.g., Cree-Green et al. 2020,  
453 Jaremka et al. 2020) and previous surveys have reported that postdocs found the process of  
454 applying for jobs to be easier when they had a strong network of support (Zimmerman 2018).  
455 The participants were further emotionally bolstered by the act of helping others to improve their  
456 materials and the idea that as a community, early-career academics all rise by helping each  
457 other. Community building as a career development strategy provides opportunities (Blackford  
458 2018), especially for historically excluded groups, to build social capital and networks that may  
459 enhance their career opportunities (Alfred et al. 2019). Similar peer review programs could fulfill  
460 the same function by providing peer support and mentorship for early-career academics at their  
461 institutions, particularly for those who may lack that support elsewhere.

462 In addition to quantifying the utility of the Program, another goal of this study was, by  
463 combining both the survey and additional participant feedback sent directly to the organizers, to  
464 identify areas of potential improvement and best practices for participating. For example, this  
465 year we began recruiting participants for the program in June 2021 and organized the first week  
466 of peer-reviewing in July instead of waiting until August. Because the COVID-19 pandemic has  
467 highlighted the need for flexibility, we also transitioned from sending out materials on Monday  
468 and asking for feedback by Friday to asking that materials be sent out on Thursday with  
469 feedback due back on Monday. One challenge we have consistently encountered is ensuring  
470 full participation for and from everyone who signs up. Often, potential participants sign up  
471 immediately after the program announcement on FuturePI Slack, but weeks later, these  
472 individuals may find themselves with too much other work to participate. We now send an email  
473 the day before to everyone who has signed up requesting confirmation that they are still willing  
474 and able to participate before assigning groups. Even with this precaution, however, a few times  
475 a year even confirmed participants discover they are unable to participate. In these instances,  
476 we try to maintain flexibility for those participants and ensure the full benefits of participation for  
477 the remaining group members. We now ask participants to notify us if a group member failed to  
478 send out their materials or failed to send back feedback on the documents of their group  
479 members. If a participant fails to do either of these actions more than twice after confirming their  
480 desire to participate, they are removed from participation for the rest of the year in order to  
481 ensure other participants do not miss out on feedback from group members too often. So far,  
482 we have not had to remove a participant. We also ask to be notified of any unprofessional  
483 review comments and immediately bar individuals who provide such comments from  
484 participating in any future rounds of peer review (Silbiger & Stubler 2019).

485 Multiple participants suggested the following best practices guidelines, which we plan to  
486 include in future Program materials: 1) Participate early when documents are still quite rough in  
487 order to get 'big picture' or overall feedback on the ideas and organization; 2) Participate more  
488 than once to get a breadth of feedback from at least 4-6 peer reviewers, but on a timeline of  
489 every other week to allow for significant revision of early drafts; 3) Participate again ~2 weeks  
490 before an important or specific deadline to get specialized feedback on nearly polished  
491 documents for a particular application.

492 Finally, the last goal of this study was to provide a model for other organizations wishing  
493 to develop similar peer-reviewing programs, in part because trainees' perceived institutional  
494 support drives career search efficacy for postdocs (St. Clair et al. 2017). Already, the authors  
495 have received anecdotal reports from former participants organically replicating the goals and

496 structure of this program in other organizations (e.g., Plant Postdoc Slack, Victoria University of  
497 Wellington Postdoctoral Society, and the NIH Office of Intramural Training and Education) for  
498 graduate students, postdocs, and other early-career academics. As indicated in our survey,  
499 although 70-80% of the respondents are employed at institutions having offices for professional  
500 development whose services might be of use to them, the majority of respondents were either  
501 unaware of any offering of editing services or sure that the offices did not offer such services.  
502 About 30-35% of respondents reported that these offices did offer such editing services, but  
503 only 10-15% of all respondents had taken advantage of this service. Moreover, the organization  
504 of similar peer-reviewing programs is not limited to universities and colleges; discipline-specific  
505 professional societies and organizations or broader national organizations like the National  
506 Postdoctoral Association could organize similar programs, either as a workshop at annual  
507 conferences or a multi-week program over the longer term. In fact, the sponsoring of such  
508 groups by professional scientific societies has been spontaneously suggested by postdocs in  
509 surveys as a way to improve their support of postdocs (Shaw et al. 2015). To lower the effort  
510 required to start a similar program, we include a 'starter' package of materials in the  
511 supplemental materials we routinely use. The focus can also be expanded to offer peer-review  
512 for the other aspects of the faculty application journey such as job talks or chalk talks (e.g.,  
513 Henderson et al. 2016) or shifted to other types of academic documents like grant applications,  
514 course syllabi, or reappointment/tenure dossiers.

515 Ultimately, programs like the FuturePI Reviewing Groups Program provide an  
516 opportunity to improve the quality of one's job application materials, which may, in turn, improve  
517 one's odds of success in attaining an independent faculty position. However, programs that  
518 build peer-support and mentorship networks for early-career academics may also play a role in  
519 retaining and strengthening a diverse academic workforce despite the structural leaks in the  
520 pipeline. Our hope is that this Program description inspires other organizations to create similar  
521 programs to support vulnerable early-career academics in their search for independence.  
522

## 523 **Supplemental Material**

524 Supplemental Material - 'Starter Pack' of example sign-up sheet, text describing the program,  
525 Confirmation email and assignment email.

526 Supplemental Table 1 - Survey Questions  
527

## 528 **Author Contributions**

529 KEG conceived of and designed the study, ET and AGT designed the survey questions with  
530 assistance from CG, AS, DK, EK, and KEG. CG, EK, AGT, and KEG analyzed the data. KEG  
531 drafted the manuscript with assistance from AS, AGT, and ET. All authors provided edits and  
532 approved the final manuscript.



## 533 Acknowledgments

534 The authors would particularly like to thank FuturePI Slack for their participation and peer  
535 support, without which this program would not continue. Dr. Grogan would like to thank Dr.  
536 Doug James, who first inspired this program with his “Teaching Triangles” exercise when I was  
537 a PhD student in his Certificate in College Teaching program at Duke University.  
538

## 539 Conflicts of Interest

540 The authors declare no conflicts of interest  
541  
542

## 543 References

- 544  
545 Acton SE, Bell AJ, Toseland CP, Twelvetrees A. A survey of new PIs in the UK. *Elife*. 2019;8.  
546 doi:10.7554/eLife.46827
- 547 Afonja S, Salmon DG, Quailley SI, Lambert WM. Postdocs’ advice on pursuing a research  
548 career in academia: A qualitative analysis of free-text survey responses. Grinnell F, editor. *PLoS*  
549 *One*. 2021;16: e0250662. doi:10.1371/journal.pone.0250662
- 550 Alfred M V., Ray SM, Johnson MA. Advancing Women of Color in STEM: An Imperative for U.S.  
551 Global Competitiveness. *Adv Dev Hum Resour*. 2019;21: 114–132.  
552 doi:10.1177/1523422318814551
- 553 Ålund M, Emery N, Jarrett BJM, MacLeod KJ, McCreery HF, Mamoozadeh N, et al. Academic  
554 ecosystems must evolve to support a sustainable postdoc workforce. *Nat Ecol Evol*. 2020;4:  
555 777–781. doi:10.1038/s41559-020-1178-6
- 556 Andalib MA, Ghaffarzadegan N, Larson RC. The Postdoc Queue: A Labour Force in Waiting.  
557 *Syst Res Behav Sci*. 2018;35: 675–686. doi:10.1002/sres.2510
- 558 Anderson VD. ImPACKful Tips: How to Write a Better Academic Cover Letter. 2019.  
559 <https://grad.ncsu.edu/news/2019/08/impackful-tips-how-to-write-a-better-academic-cover-letter/>
- 560 Aschwanden C. Professionalizing the Postdoctoral Experience. *Cell*. 2006;124: 445–447.  
561 doi:10.1016/j.cell.2006.01.025
- 562 Azoulay P, Li D. Scientific Grant Funding. NBER Work Pap. Cambridge, MA; 2020 Mar.  
563 doi:10.3386/w26889
- 564 Beech BM, Calles-Escandon J, Hairston KG, Langdon SE, Latham-Sadler BA, Bell RA.  
565 Mentoring Programs for Underrepresented Minority Faculty in Academic Medical Centers. *Acad*  
566 *Med*. 2013;88: 541–549. doi:10.1097/ACM.0b013e31828589e3

- 567 Bhalla N. Strategies to improve equity in faculty hiring. Welch M, editor. *Mol Biol Cell*. 2019;30:  
568 2744–2749. doi:10.1091/mbc.E19-08-0476
- 569 Blackford S. Harnessing the power of communities: career networking strategies for bioscience  
570 PhD students and postdoctoral researchers. *FEMS Microbiol Lett*. 2018;365: 2010–2017.  
571 doi:10.1093/femsle/fny033
- 572 Brommer CL, Eisen A. FIRST: A MODEL FOR INCREASING QUALITY MINORITY  
573 PARTICIPATION IN THE SCIENCES FROM THE UNDERGRADUATE TO THE  
574 PROFESSORIAL LEVEL. *J Women Minor Sci Eng*. 2006;12: 35–46.  
575 doi:10.1615/JWomenMinorScienEng.v12.i1.30
- 576 Bruckmann C, Sebestyén E. Ten simple rules to initiate and run a postdoctoral association.  
577 Lewitter F, editor. *PLoS Comput Biol*. 2017;13: e1005664. doi:10.1371/journal.pcbi.1005664
- 578 Cree-Green M, Carreau A-M, Davis SM, Frohnert BI, Kaar JL, Ma NS, et al. Peer mentoring for  
579 professional and personal growth in academic medicine. *J Investig Med*. 2020;68: 1128–1134.  
580 doi:10.1136/jim-2020-001391
- 581 Cull WL, O'Connor KG, Sharp S, Tang SS. Response Rates and Response Bias for 50 Surveys  
582 of Pediatricians. *Health Serv Res*. 2005;40: 213–226. doi:10.1111/j.1475-6773.2005.00350.x
- 583 Demicheli V, Di Pietrantonj C. Peer review for improving the quality of grant applications.  
584 *Cochrane Database Syst Rev*. 2007. doi:10.1002/14651858.MR000003.pub2
- 585 Dickson KS, Glass JE, Barnett ML, Graham AK, Powell BJ, Stadnick NA. Value of peer  
586 mentoring for early career professional, research, and personal development: a case study of  
587 implementation scientists. *J Clin Transl Sci*. 2021;5: e112. doi:10.1017/cts.2021.776
- 588 Eisen A, Eaton DC. A Model for Postdoctoral Education That Promotes Minority and Majority  
589 Success in the Biomedical Sciences. Bauerle C, editor. *CBE—Life Sci Educ*. 2017;16: ar65.  
590 doi:10.1187/cbe.17-03-0051
- 591 Feinerer I & Hornik K. tm: Text Mining Package. R package Version 0.7-8. [https://cran.r-](https://cran.r-project.org/web/packages/tm/index.html)  
592 [project.org/web/packages/tm/index.html](https://cran.r-project.org/web/packages/tm/index.html)
- 593 Fellows I. wordcloud: Word Clouds. R package version 2.6. [https://cran.r-](https://cran.r-project.org/web/packages/wordcloud/index.html)  
594 [project.org/web/packages/wordcloud/index.html](https://cran.r-project.org/web/packages/wordcloud/index.html)
- 595 Fernandes JD, Sarabipour S, Smith CT, Niemi NM, Jadavji NM, Kozik AJ, et al. A survey-based  
596 analysis of the academic job market. *Elife*. 2020;9: 1–30. doi:10.7554/eLife.54097
- 597 Groll H. Searching for the one. *Elife*. 2017;6: 1–3. doi:10.7554/eLife.32016
- 598 Haffar S, Bazerbachi F, Murad MH. Peer Review Bias: A Critical Review. *Mayo Clin Proc*.  
599 2019;94: 670–676. doi:10.1016/j.mayocp.2018.09.004

- 600 Hayter CS, Parker MA. Factors that influence the transition of university postdocs to non-  
601 academic scientific careers: An exploratory study. *Res Policy*. 2019;48: 556–570.  
602 doi:10.1016/j.respol.2018.09.009
- 603 Henderson RI, Syed N. The Mock Academic Faculty Position Competition. *Acad Med*. 2016;91:  
604 1661–1665. doi:10.1097/ACM.0000000000001111
- 605 Jaremka LM, Ackerman JM, Gawronski B, Rule NO, Sweeny K, Tropp LR, et al. Common  
606 Academic Experiences No One Talks About: Repeated Rejection, Impostor Syndrome, and  
607 Burnout. *Perspect Psychol Sci*. 2020;15: 519–543. doi:10.1177/1745691619898848
- 608 Jena AB, Khullar D, Ho O, Olenski AR, Blumenthal DM. Sex Differences in Academic Rank in  
609 US Medical Schools in 2014. *JAMA*. 2015;314: 1149. doi:10.1001/jama.2015.10680
- 610 Kahn S, Ginther DK. The impact of postdoctoral training on early careers in biomedicine. *Nat*  
611 *Biotechnol*. 2017;35: 90–94. doi:10.1038/nbt.3766
- 612 Kulage KM, Larson EL. Implementation and Outcomes of a Faculty-Based, Peer Review  
613 Manuscript Writing Workshop. *J Prof Nurs*. 2016;32: 262–270.  
614 doi:10.1016/j.profnurs.2016.01.008
- 615 Lambert WM, Wells MT, Cipriano MF, Sneva JN, Morris JA, Golightly LM. Career choices of  
616 underrepresented and female postdocs in the biomedical sciences. *Elife*. 2020;9: 1–18.  
617 doi:10.7554/eLife.48774
- 618 Lauer MS, Roychowdhury D. Inequalities in the distribution of National Institutes of Health  
619 research project grant funding. *Elife*. 2021;10: 1–17. doi:10.7554/eLife.71712
- 620 Lerchenmueller MJ, Sorenson O. The gender gap in early career transitions in the life sciences.  
621 *Res Policy*. 2018;47: 1007–1017. doi:10.1016/j.respol.2018.02.009
- 622 Marsh HW, Bornmann L, Mutz R, Daniel H-D, O'Mara A. Gender Effects in the Peer Reviews of  
623 Grant Proposals: A Comprehensive Meta-Analysis Comparing Traditional and Multilevel  
624 Approaches. *Rev Educ Res*. 2009;79: 1290–1326. doi:10.3102/0034654309334143
- 625 McConnell SC, Westerman EL, Pierre JF, Heckler EJ, Schwartz NB. United States National  
626 Postdoc Survey results and the interaction of gender, career choice and mentor impact. *Elife*.  
627 2018;7: 1–15. doi:10.7554/eLife.40189
- 628 Meyers LC, Brown AM, Moneta-Koehler L, Chalkley R. Survey of checkpoints along the  
629 pathway to diverse biomedical research faculty. Bianchi C, editor. *PLoS One*. 2018;13:  
630 e0190606. doi:10.1371/journal.pone.0190606
- 631 Murray D, Siler K, Larivière V, Chan WM, Collings AM, Raymond J, et al. Author-Reviewer  
632 Homophily in Peer Review. *bioRxiv*. 2019; 400515. doi:10.1101/400515

- 633 National Academy of Sciences, National Academy of Engineering, and Institute of Medicine.  
634 2000. *Enhancing the Postdoctoral Experience for Scientists and Engineers: A Guide for*  
635 *Postdoctoral Scholars, Advisers, Institutions, Funding Organizations, and Disciplinary Societies.*  
636 Washington, DC: The National Academies Press.<https://doi.org/10.17226/9831>.
- 637 National Academy of Sciences, National Academy of Engineering, and Institute of Medicine.  
638 2014. *The Postdoctoral Experience Revisited.* Washington, DC: The National Academies Press.  
639 <https://doi.org/10.17226/18982>.
- 640 National Science Foundation, National Center for Science and Engineering Statistics. 2017.  
641 *Women, Minorities, and Persons with Disabilities in Science and Engineering: 2017.* Special  
642 Report NSF 17-310. Arlington, VA. Available at [www.nsf.gov/statistics/wmpd/](http://www.nsf.gov/statistics/wmpd/).
- 643 Omary MB, Shah YM, Schnell S, Subramanian S, Swanson MS, O'Riordan MX. Enhancing  
644 career development of postdoctoral trainees: act locally and beyond. *J Physiol.* 2019;597:  
645 2317–2322. doi:10.1113/JP277684
- 646 Powell K. Daunting but doable: Job searching after a postdoc. *Science.* 2020 pp. 1019–1021.  
647 Available: [https://www.science.org/features/2020/08/daunting-doable-job-searching-after-](https://www.science.org/features/2020/08/daunting-doable-job-searching-after-postdoc)  
648 [postdoc](https://www.science.org/features/2020/08/daunting-doable-job-searching-after-postdoc)
- 649 Pyhältö K, McAlpine L, Peltonen J, Castello M. How does social support contribute to engaging  
650 post-PhD experience? *Eur J High Educ.* 2017;7: 373–387.  
651 doi:10.1080/21568235.2017.1348239
- 652 Rennie D. Let's make peer review scientific. *Nature.* 2016;535: 31–33. doi:10.1038/535031a
- 653 Reyes V. How to Write a Successful Cover Letter. *Inside Higher Ed.* 2020.  
654 [https://www.insidehighered.com/advice/2020/01/22/dos-and-donts-writing-cover-letter-](https://www.insidehighered.com/advice/2020/01/22/dos-and-donts-writing-cover-letter-academic-job-market-opinion)  
655 [academic-job-market-opinion](https://www.insidehighered.com/advice/2020/01/22/dos-and-donts-writing-cover-letter-academic-job-market-opinion)
- 656 Rodrigues MA, Mendenhall R, Clancy KBH. "THERE'S REALIZING, AND THEN THERE'S  
657 REALIZING": HOW SOCIAL SUPPORT CAN COUNTER GASLIGHTING OF WOMEN OF  
658 COLOR SCIENTISTS. *J Women Minor Sci Eng.* 2021;27: 1–23.  
659 doi:10.1615/JWomenMinorScienEng.2020034630
- 660 Sauermann H, Roach M. Science PhD Career Preferences: Levels, Changes, and Advisor  
661 Encouragement. Nunes Amaral LA, editor. *PLoS One.* 2012;7: e36307.  
662 doi:10.1371/journal.pone.0036307
- 663 Sax LJ, Gilmartin SK, Bryant AN. Assessing Response Rates and Nonresponse Bias in Web  
664 and Paper Surveys. *Res High Educ.* 2003;44: 409–432. doi:10.1023/A:1024232915870
- 665 Scaffidi AK, Berman JE. A positive postdoctoral experience is related to quality supervision and  
666 career mentoring, collaborations, networking and a nurturing research environment. *High Educ.*  
667 2011;62: 685–698. doi:10.1007/s10734-011-9407-1

- 668 Shaw AK, Stanton DE, Supp SR, Budden A, Eby S, Reynolds PL, et al. Ecology Postdocs in  
669 Academia: Primary Concerns and Possible Solutions. *Bull Ecol Soc Am.* 2015;96: 140–152.  
670 doi:10.1890/0012-9623-96.1.140
- 671 Silbiger NJ, Stubler AD. Unprofessional peer reviews disproportionately harm underrepresented  
672 groups in STEM. *PeerJ.* 2019;7: e8247. doi:10.7717/peerj.8247
- 673 Smith C. How to Construct a Compelling Research Statement. 2020a.  
674 <https://grad.ncsu.edu/news/2020/04/tips-on-writing-an-effective-teaching-statement/>
- 675 Smith C. Tips on Writing an Effective Teaching Statement. 2020b.  
676 <https://grad.ncsu.edu/news/2020/04/how-to-construct-a-compelling-research-statement/>
- 677 St. Clair R, Hutto T, MacBeth C, Newstetter W, McCarty NA, Melkers J. The “new normal”:  
678 Adapting doctoral trainee career preparation for broad career paths in science. Ito E, editor.  
679 *PLoS One.* 2017;12: e0177035. doi:10.1371/journal.pone.0177035
- 680 Stachl CN, Baranger AM. Sense of belonging within the graduate community of a research-  
681 focused STEM department: Quantitative assessment using a visual narrative and item response  
682 theory. Blanch A, editor. *PLoS One.* 2020;15: e0233431. doi:10.1371/journal.pone.0233431
- 683 Tennant JP, Dugan JM, Graziotin D, Jacques DC, Waldner F, Mietchen D, et al. A multi-  
684 disciplinary perspective on emergent and future innovations in peer review. *F1000Research.*  
685 2017;6: 1151. doi:10.12688/f1000research.12037.1
- 686 Tennant JP, Ross-Hellauer T. The limitations to our understanding of peer review. *Res Integr  
687 Peer Rev.* 2020;5: 6. doi:10.1186/s41073-020-00092-1
- 688 Vekkaila J, Virtanen V, Taina J, Pyhältö K. The function of social support in engaging and  
689 disengaging experiences among post PhD researchers in STEM disciplines. *Stud High Educ.*  
690 2018;43: 1439–1453. doi:10.1080/03075079.2016.1259307
- 691 Wanelik KM, Griffin JS, Head ML, Ingleby FC, Lewis Z. Breaking barriers? Ethnicity and  
692 socioeconomic background impact on early career progression in the fields of ecology and  
693 evolution. *Ecol Evol.* 2020;10: 6870–6880. doi:10.1002/ece3.6423
- 694 Witteman HO, Hendricks M, Straus S, Tannenbaum C. Are gender gaps due to evaluations of  
695 the applicant or the science? A natural experiment at a national funding agency. *Lancet.*  
696 2019;393: 531–540. doi:10.1016/S0140-6736(18)32611-4
- 697 Woolston C. Postdoc survey reveals disenchantment with working life. *Nature.* 2020;587: 505–  
698 508. doi:10.1038/d41586-020-03191-7
- 699 Yadav A, Seals C. Taking the next step: supporting postdocs to develop an independent path in  
700 academia. *Int J STEM Educ.* 2019;6: 15. doi:10.1186/s40594-019-0168-1



- 701 Ysseldyk R, Greenaway KH, Hassinger E, Zutrauen S, Lintz J, Bhatia MP, et al. A Leak in the  
702 Academic Pipeline: Identity and Health Among Postdoctoral Women. *Front Psychol.* 2019;10:  
703 1–17. doi:10.3389/fpsyg.2019.01297
- 704 Zeng A, Shen Z, Zhou J, Fan Y, Di Z, Wang Y, et al. Increasing trend of scientists to switch  
705 between topics. *Nat Commun.* 2019;10: 3439. doi:10.1038/s41467-019-11401-8
- 706 Zimmerman AM. Navigating the path to a biomedical science career. Reddy S V., editor. *PLoS*  
707 *One.* 2018;13: e0203783. doi:10.1371/journal.pone.0203783
